# Supplementary material for: Common Genetic Variation Near the Phospholamban Gene Is Associated with Cardiac Repolarisation: Meta-Analysis of Three Genome-Wide Association Studies
Source: PLoS One. 2009 Jul 9;4(7):e6138. doi: 10.1371/journal.pone.0006138 (PMC2704957; doi:10.1371/journal.pone.0006138)
Supplement: Appendix S1 — Consortium members and affiliations (0.06 MB DOC) [file pone.0006138.s006.doc]

**Appendix:**

**WTCCC Membership and affiliations**

**Membership of the Wellcome Trust Case Control Consortium (WTCCC)**

**Management Committee:** Paul R Burton1, David G Clayton2, Lon R Cardon3, Nick Craddock4, Panos Deloukas5, Audrey Duncanson6, Dominic P Kwiatkowski3,5, Mark I McCarthy3,7, Willem H Ouwehand8,9, Nilesh J Samani10, John A Todd2, Peter Donnelly (Chair)11

**Analysis Committee:** Jeffrey C Barrett3, Paul R Burton1, Dan Davison11, Peter Donnelly11, Doug Easton12, David Evans3, Hin-Tak Leung2, Jonathan L Marchini11, Andrew P Morris3, I CA Spencer11, Martin D Tobin1, Lon R Cardon (Co-chair)3, David G Clayton (Co-chair)2

**UK Blood Services & University of Cambridge Controls**: Antony P Attwood5,8, James P Boorman8,9, Barbara Cant8, Ursula Everson13, Judith M Hussey14, Jennifer D Jolley8, Alexandra S Knight8, Kerstin Koch8, Elizabeth Meech15, Sarah Nutland2, Christopher V Prowse16, Helen E Stevens2, Niall C Taylor8, Graham R Walters17, Neil M Walker2, Nicholas A Watkins8,9, Thilo Winzer8, John A Todd2, Willem H Ouwehand8,9

**1958 Birth Cohort Controls:** Richard W Jones18, Wendy L McArdle18, Susan M Ring18, David P Strachan19, Marcus Pembrey18,20

**Bipolar Disorder (Aberdeen):** Gerome Breen21, David St Clair21; (**Birmingham):** Sian Caesar22, Katherine Gordon-Smith22,23, Lisa Jones22; **(Cardiff):** Christine Fraser23, Elaine K Green23, Detelina Grozeva23, Marian L Hamshere23, Peter A Holmans23, Ian R Jones23, George Kirov23, Valentina Moskvina23, Ivan Nikolov23, Michael C O’Donovan23, Michael J Owen23, Nick Craddock23; **(London):** David A Collier24, Amanda Elkin24, Anne Farmer24, Richard Williamson24, Peter McGuffin24; **(Newcastle):** Allan H Young25, I Nicol Ferrier25

**Coronary Artery Disease (Leeds):** Stephen G Ball26, Anthony J Balmforth26, Jennifer H Barrett26, D Timothy Bishop26, Mark M Iles26, Azhar Maqbool26, Nadira Yuldasheva26, Alistair S Hall26; **(Leicester):** Peter S Braund10, Paul R Burton1, Richard J Dixon10, Massimo Mangino10, Suzanne Stevens10, Martin D Tobin1, John R Thompson1, Nilesh J Samani10

**Crohn’s Disease (Cambridge):** Francesca Bredin27, Mark Tremelling27, Miles Parkes27; **(Edinburgh):** Hazel Drummond28, Charles W Lees28, Elaine R Nimmo28, Jack Satsangi28; **(London):** Sheila A Fisher29, Alastair Forbes30, Cathryn M Lewis29, Clive M Onnie29, Natalie J Prescott29, Jeremy Sanderson31, Christopher G Mathew29; **(Newcastle):** Jamie Barbour32, M Khalid Mohiuddin32, Catherine E Todhunter32, John C Mansfield32; **(Oxford):** Tariq Ahmad33, Fraser R Cummings33, Derek P Jewell33

**Hypertension (Aberdeen):** John Webster34; **(Cambridge):** Morris J Brown35, David G Clayton2; **(Evry, France): G** Mark Lathrop36; **(Glasgow):** John Connell37, Anna Dominiczak37; **(Leicester):** Nilesh J Samani10; **(London):** Carolina A Braga Marcano38, Beverley Burke38, Richard Dobson38, Johannie Gungadoo38, Kate L Lee38, Patricia B Munroe38, Stephen J Newhouse38, Abiodun Onipinla38, I Wallace38, Mingzhan Xue38, Mark Caulfield38; **(Oxford):** Martin Farrall39

**Rheumatoid Arthritis:** Anne Barton40, The Biologics in RA Genetics and Genomics Study Syndicate (BRAGGS) Steering Committee*, Ian N Bruce40, Hannah Donovan40, Steve Eyre40, Paul D Gilbert40, Samantha L Hider40, Anne M Hinks40, Sally L John40, Catherine Potter40, Alan J Silman40, Deborah PM Symmons40, Wendy Thomson40, Jane Worthington40

**Type 1 Diabetes:** David G Clayton2, David B Dunger2,41, Sarah Nutland2, Helen E Stevens2, Neil M Walker2, Barry Widmer2,41, John A Todd2

**Type 2 Diabetes (Exeter):** Timothy M Frayling42,43, Rachel M Freathy42,43, Hana Lango42,43, John R B Perry42,43, Beverley M Shields43, Michael N Weedon42,43, Andrew T Hattersley42,43; **(London):** Graham A Hitman44; **(Newcastle):** Mark Walker45; **(Oxford):** Kate S Elliott3,7, Christopher J Groves7, Cecilia M Lindgren3,7, Nigel W Rayner3,7, Nicholas J Timpson3,46, Eleftheria Zeggini3,7, Mark I McCarthy3,7

**Tuberculosis (Gambia):** Melanie Newport47, Giorgio Sirugo47; **(Oxford):** Emily Lyons3, Fredrik Vannberg3, Adrian VS Hill3

**Ankylosing Spondylitis:** Linda A Bradbury48, Claire Farrar49, Jennifer J Pointon48, Paul Wordsworth49, Matthew A Brown48,49

**AutoImmune Thyroid Disease:** Jayne A Franklyn50, Joanne M Heward50, Matthew J Simmonds50, Stephen CL Gough50

**Breast Cancer:** Sheila Seal51, Breast Cancer Susceptibility Collaboration (UK)*, Michael R Stratton51,52, Nazneen Rahman51

**Multiple Sclerosis:** Maria Ban53, An Goris53, Stephen J Sawcer53, Alastair Compston53

**Gambian Controls (Gambia):** David Conway47, Muminatou Jallow47, Melanie Newport47, Giorgio Sirugo47; **(Oxford):** Kirk A Rockett3, Dominic P Kwiatkowski3,5

**DNA, Genotyping, Data QC and Informatics (Wellcome Trust Sanger Institute, Hinxton):** Claire Bryan5, Suzannah J Bumpstead5, Amy Chaney5, Kate Downes2,5, Jilur Ghori5, Rhian Gwilliam5, Sarah E Hunt5, Michael Inouye5, Andrew Keniry5, Emma King5, Ralph McGinnis5, Simon Potter5, Rathi Ravindrarajah5, Pamela Whittaker5, David Withers5, Panos Deloukas5; **(Cambridge):** Hin-Tak Leung2, Sarah Nutland2, Helen E Stevens2, Neil M Walker2, John A Todd2

**Statistics (Cambridge):** Doug Easton12, David G Clayton2; **(Leicester):** Paul R Burton1, Martin D Tobin1; **(Oxford):** Jeffrey C Barrett3, David Evans3, Andrew P Morris3, Lon R Cardon3; **(Oxford):** Niall J Cardin11, Dan Davison11, Teresa Ferreira11, Joanne Pereira-Gale11, Ingeleif B Hallgrimsdóttir11, Bryan N Howie11, Jonathan L Marchini11, I CA Spencer11, Zhan Su11, Yik Ying Teo3,11, Damjan Vukcevic11, Peter Donnelly11

**PIs:** David Bentley5,54, Matthew A Brown48,49, Lon R Cardon3, Mark Caulfield38, David G Clayton2, Alistair Compston53, Nick Craddock23, Panos Deloukas5, Peter Donnelly11, Martin Farrall39, Stephen CL Gough50, Alistair S Hall26, Andrew T Hattersley42,43, Adrian VS Hill3, Dominic P Kwiatkowski3,5, Christopher G Mathew29, Mark I McCarthy3,7, Willem H Ouwehand8,9, Miles Parkes27, Marcus Pembrey18,20, Nazneen Rahman51, Nilesh J Samani10, Michael R Stratton51,52, John A Todd2, Jane Worthington40

*1 Genetic Epidemiology Group, Department of Health Sciences, University of Leicester, Adrian Building, University Road, Leicester, LE1 7RH, UK; 2 Juvenile Diabetes Research Foundation/Wellcome Trust Diabetes and Inflammation Laboratory, Department of Medical Genetics, Cambridge Institute for Medical Research, University of Cambridge, Wellcome Trust/MRC Building, Cambridge, CB2 0XY, UK; 3 Wellcome Trust Centre for Human Genetics, University of Oxford, Roosevelt Drive, Oxford OX3 7BN, UK; 4 Department of Psychological Medicine, Henry Wellcome Building, School of Medicine, Cardiff University, Heath Park, Cardiff CF14 4XN, UK; 5 The Wellcome Trust Sanger Institute, Wellcome Trust Genome Campus, Hinxton, Cambridge CB10 1SA, UK; 6 The Wellcome Trust, Gibbs Building, 215 Euston Road, London NW1 2BE, UK; 7 Oxford Centre for Diabetes, Endocrinology and Medicine, University of Oxford, Churchill Hospital, Oxford, OX3 7LJ, UK; 8 Department of Haematology, University of Cambridge, Long Road, Cambridge, CB2 2PT, UK; 9 National Health Service Blood and Transplant, Cambridge Centre, Long Road, Cambridge, CB2 2PT, UK; 10 Department of Cardiovascular Sciences, University of Leicester, Glenfield Hospital, Groby Road, Leicester, LE3 9QP, UK; 11 Department of Statistics, University of Oxford, 1 South Parks Road, Oxford OX1 3TG, UK; 12 Cancer Research UK Genetic Epidemiology Unit, Strangeways Research Laboratory, Worts Causeway, Cambridge CB1 8RN, UK; 13 National Health Service Blood and Transplant, Sheffield Centre, Longley Lane, Sheffield S5 7JN, UK; 14 National Health Service Blood and Transplant, Brentwood Centre, Crescent Drive, Brentwood, CM15 8DP, UK; 15 The Welsh Blood Service, Ely Valley Road, Talbot Green, Pontyclun, CF72 9WB, UK; 16 The Scottish National Blood Transfusion Service, Ellen’s Glen Road, Edinburgh, EH17 7QT, UK; 17 National Health Service Blood and Transplant, Southampton Centre, Coxford Road, Southampton, SO16 5AF, UK; 18 Avon Longitudinal Study of Parents and Children, University of Bristol, 24 Tyndall Avenue, Bristol, BS8 1TQ, UK; 19 Division of Community Health Services, St George’s University of London, Cranmer Terrace, London SW17 0RE, UK; 20 Institute of Child Health, University College London, 30 Guilford St, London WC1N 1EH, UK; 21 University of Aberdeen, Institute of Medical Sciences, Foresterhill, Aberdeen, AB25 2ZD, UK; 22 Department of Psychiatry, Division of Neuroscience, Birmingham University, Birmingham, B15 2QZ, UK; 23 Department of Psychological Medicine, Henry Wellcome Building, School of Medicine, Cardiff University, Heath Park, Cardiff CF14 4XN, UK; 24 SGDP, The Institute of Psychiatry, King’s College London, De Crespigny Park Denmark Hill London SE5 8AF, UK; 25 School of Neurology, Neurobiology and Psychiatry, Royal Victoria Infirmary, Queen Victoria Road, Newcastle upon Tyne, NE1 4LP, UK; 26 LIGHT and LIMM Research Institutes, Faculty of Medicine and Health, University of Leeds, Leeds, LS1 3EX, UK; 27 IBD Research Group, Addenbrooke’s Hospital, University of Cambridge, Cambridge, CB2 2QQ, UK; 28 Gastrointestinal Unit, School of Molecular and Clinical Medicine, University of Edinburgh, Western General Hospital, Edinburgh EH4 2XU UK; 29 Department of Medical & Molecular Genetics, King’s College London School of Medicine, 8th Floor Guy’s Tower, Guy’s Hospital, London, SE1 9RT, UK; 30 Institute for Digestive Diseases, University College London Hospitals Trust, London, NW1 2BU, UK; 31 Department of Gastroenterology, Guy’s and St Thomas’ NHS Foundation Trust, London, SE1 7EH, UK; 32 Department of Gastroenterology & Hepatology, University of Newcastle upon Tyne, Royal Victoria Infirmary, Newcastle upon Tyne, NE1 4LP, UK; 33 Gastroenterology Unit, Radcliffe Infirmary, University of Oxford, Oxford, OX2 6HE, UK; 34 Medicine and Therapeutics, Aberdeen Royal Infirmary, Foresterhill, Aberdeen, Grampian AB9 2ZB, UK; 35 Clinical Pharmacology Unit and the Diabetes and Inflammation Laboratory, University of Cambridge, Addenbrookes Hospital, Hills Road, Cambridge CB2 2QQ, UK; 36 Centre National de Genotypage, 2, Rue Gaston Cremieux, Evry, Paris 91057.; 37 BHF Glasgow Cardiovascular Research Centre, University of Glasgow, 126 University Place, Glasgow, G12 8TA, UK; 38 Clinical Pharmacology and Barts and The London Genome Centre, William Harvey Research Institute, Barts and The London, Queen Mary’s School of Medicine, Charterhouse Square, London EC1M 6BQ, UK; 39 Cardiovascular Medicine, University of Oxford, Wellcome Trust Centre for Human Genetics, Roosevelt Drive, Oxford OX3 7BN, UK; 40arc Epidemiology Research Unit, University of Manchester, Stopford Building, Oxford Rd, Manchester, M13 9PT, UK; 41 Department of Paediatrics, University of Cambridge, Addenbrooke’s Hospital, Cambridge, CB2 2QQ, UK; 42 Genetics of Complex Traits, Institute of Biomedical and Clinical Science, Peninsula Medical School, Magdalen Road, Exeter EX1 2LU UK; 43 Diabetes Genetics, Institute of Biomedical and Clinical Science, Peninsula Medical School, Barrack Road, Exeter EX2 5DU UK; 44 Centre for Diabetes and Metabolic Medicine, Barts and The London, Royal London Hospital, Whitechapel, London, E1 1BB UK; 45 Diabetes Research Group, School of Clinical Medical Sciences, Newcastle University, Framlington Place, Newcastle upon Tyne NE2 4HH, UK; 46 The MRC Centre for Causal Analyses in Translational Epidemiology, Bristol University, Canynge Hall, Whiteladies Rd, Bristol BS2 8PR, UK; 47 MRC Laboratories, Fajara, The Gambia; 48 Diamantina Institute for Cancer, Immunology and Metabolic Medicine, Princess Alexandra Hospital, University of Queensland, Woolloongabba, Qld 4102, Australia; 49 Botnar Research Centre, University of Oxford, Headington, Oxford OX3 7BN, UK; 50 Department of Medicine, Division of Medical Sciences, Institute of Biomedical Research, University of Birmingham, Edgbaston, Birmingham B15 2TT, UK; 51 Section of Cancer Genetics, Institute of Cancer Research, 15 Cotswold Road, Sutton, SM2 5NG, UK; 52 Cancer Genome Project, The Wellcome Trust Sanger Institute, Wellcome Trust Genome Campus, Hinxton, Cambridge CB10 1SA, UK; 53 Department of Clinical Neurosciences, University of Cambridge, Addenbrooke’s Hospital, Hills Road, Cambridge CB2 2QQ, UK; 54 PRESENT ADDRESS: Illumina Cambridge, Chesterford Research Park, Little Chesterford, Nr Saffron Walden, Essex, CB10 1XL, UK.*

**QTSCD Membership:**

Arne Pfeufer 1,2, Serena Sanna3, Dan E Arking4, Martina Mu¨ller 5–7, Vesela Gateva8,

Christian Fuchsberger9, Georg B Ehret4, Marco Orru´ 3, Cristian Pattaro9, Anna Ko¨ttgen10, Siegfried Perz11, Gianluca Usala3, Maja Barbalic12, Man Li10, Benno Pu¨tz13, Angelo Scuteri14, Ronald J Prineas15, Moritz F Sinner7, Christian Gieger5, Samer S Najjar16, W H Linda Kao10, Thomas W. Mu¨hleisen17,18, Mariano Dei3, Christine Happle1,2, Stefan Mo¨hlenkamp19, Laura Crisponi3, Raimund Erbel19,

Karl-Heinz Jo¨ckel20, Silvia Naitza3, Gerhard Steinbeck7, Fabio Marroni9, Andrew A Hicks9, Edward Lakatta16, Bertram Mu¨ller-Myhsok13, Peter P Pramstaller9,21,22, H-Erich Wichmann5,6, David Schlessinger23, Eric Boerwinkle12, Thomas Meitinger1,2, Manuela Uda3, Josef Coresh10,24, Stefan Ka¨a¨b7, Goncalo R Abecasis8 & Aravinda Chakravarti4,24

1 Institute of Human Genetics, Technical University Munich, Germany.

2Institute of Human Genetics, Helmholtz Center Munich, Germany.

3Istituto di Neurogenetica e Neurofarmacologia, CNR, Monserrato, Cagliari, Italy. 4McKusick-Nathans Institute of Genetic Medicine, Johns Hopkins University, Baltimore, Maryland, USA.

5Institute of Epidemiology, Helmholtz Center Munich, Germany.

6Institute of Informatics, Biometry and Epidemiology, Ludwig-Maximilians-Universitat, Munich, Germany.

7Department of Medicine I, Klinikum Grosshadern, Munich, Germany.

8Center for Statistical Genetics, Department of Biostatistics, University of Michigan, Ann Arbor, Michigan, USA.

9Institute of Genetic Medicine, EURAC European Academy, Bolzano, Italy. 10Department of Epidemiology, Johns Hopkins University, Baltimore, Maryland, USA. 11Institute of Medical Informatics, Helmholtz Center Munich, Germany.

12Genetics Center, University of Texas Health Science Center, Houston, Texas, USA. 13Statistical Genetics, Max Planck Institute of Psychiatry, Munich, Germany.

14Unita` Operativa Geriatria, Istituto Ricovero e Cura per Anziani, Rome, Italy.

15Wake Forest University School of Medicine, Winston-Salem, North Carolina, USA. 16Laboratory of Cardiovascular Science, Gerontology Research Center, National Institute on Aging, Baltimore, Maryland, USA.

17Department of Genomics, Life & Brain Center, University of Bonn, Bonn, Germany. 18Institute of Human Genetics, University of Bonn, Bonn, Germany.

19Clinic of Cardiology, West German Heart Center, University Hospital of Essen, University Duisburg-Essen, Germany.

20Institute for Medical Informatics, Biometry and Epidemiology, University Hospital of Essen, University Duisburg-Essen, Germany.

21Department of Neurology, General Central Hospital, Via Bohler 5, Bolzano, Italy. 22Department of Neurology, University of Lu¨ beck, Lu¨ beck, Germany.

23Laboratory of Genetics, National Institute on Aging, Baltimore, Maryland, USA. 24Department of Medicine, Johns Hopkins University, Baltimore, Maryland, USA.

**QTGEN Membership:**

Christopher Newton-Cheh1–3, Mark Eijgelsheim4, Kenneth M Rice5, Paul I Wde Bakker2,6, Xiaoyan Yin3,7, Karol Estrada8, Joshua C Bis9,10, Kristin Marciante9,10, Fernando Rivadeneira4,8, Peter A Noseworthy1, Nona Sotoodehnia9,11, Nicholas L Smith9,12,13, Jerome I Rotter14, Jan A Kors15, Jacqueline CM Witteman4,16, Albert Hofman4,16, Susan R Heckbert9,12,17, Christopher J O’Donnell3,18,19, Andre´ G Uitterlinden4,8,16, Bruce M Psaty10,12,17,20, Thomas Lumley5, Martin G Larson3,7, & Bruno H Ch Stricker4,8,16,20

1Center for Human Genetic Research, Cardiovascular Research Center, Massachusetts General Hospital, Boston, Massachusetts, USA.

2Program in Medical and Population Genetics, Broad Institute of Harvard and MIT, Cambridge, Massachusetts, USA.

3National Heart, Lung and Blood Institute’s Framingham Heart Study, Framingham, Massachusetts, USA.

4Department of Epidemiology, Erasmus Medical Center, Rotterdam, The Netherlands. 5Department of Biostatistics, University of Washington, Seattle, Washington, USA. 6Division of Genetics, Department of Medicine, Brigham and Women’s Hospital, Boston, Massachusetts, USA.

7Department of Mathematics and Statistics, Boston University, Boston, Massachusetts, USA.

8Department of Internal Medicine, Erasmus Medical Center, Rotterdam, The Netherlands.

9Cardiovascular Health Research Unit, University of Washington, Metropolitan Park East Tower, Seattle, Washington, USA.

10Department of Medicine, University of Washington, Seattle, Washington, USA. 11Division of Cardiology, Department of Medicine, University of Washington School of Medicine, Seattle, Washington, USA.

12Department of Epidemiology, University of Washington, Seattle, Washington, USA. 13Seattle Epidemiologic Research Center, Veterans Administration Office of Research and Development, Seattle, Washington, USA.

14Medical Genetics Institute, Cedars-Sinai Medical Center, Los Angeles, California, USA.

15Department of Medical Informatics, Erasmus Medical Center, Rotterdam, The Netherlands.

16Netherlands Genomics Initiative-sponsored Netherlands Consortium for Healthy Aging,

PO Box 2040, 3000 CA Rotterdam, The Netherlands.

17Center for Health Studies, Group Health, Seattle, Washington, USA.

18National Heart, Lung and Blood Institute, Bethesda, Maryland, USA.

19Cardiology Division, Massachusetts General Hospital, Boston, Massachusetts, USA. 20Department of Health Services, University of Washington, Seattle, Washington, USA.
